# Supplementary material
Source: publisher site journal article supplement (https://www.dovepress.com/article/600571)
Supplement: Supplementary file 1 [file 600571%20Appendix%20file.pdf]

## Appendix 1

Table S1. Laboratory reagents

| Reagen                                                      | Source            | Catalog No. |
|-------------------------------------------------------------|-------------------|-------------|
| Red Blood Cell (RBC) Lysis Buffer                           | Servicebio        | G2015       |
| PBS                                                         | Servicebio        | G4202       |
| Nuclease-Free Water                                         | Servicebio        | G4700       |
| Absolute Ethanol                                            | SCRC              | 10009218    |
| Isopropanol                                                 | SCRC              | 80109218    |
| Methanol                                                    | SCRC              | 40064260    |
| Trizol Reagent                                              | Invitrogen        | 15596-026   |
| Chloroform substitute                                       | Servicebio        | G3014-02    |
| HP All-in-one qRT Master Mix II                             | YUNBIO            | RT203       |
| 2×Universal SYBR qPCR Master Mix                            | YUNBIO            | QP1015      |
| RIPA Lysis Buffer                                           | LABLEAD           | R1091       |
| 12.5% Fast PAGE Gel Preparation Kit                         | EpiZyme           | PG133       |
| Enhanced Chemiluminescence (ECL) Kit                        | LABLEAD           | E1050       |
| Ice-Bath-Free Transfer Buffer (Powder)                      | Servicebio        | JN-0036     |
| 5×Loading buffer                                            | Servicebio        | G2013       |
| 10×TBST Buffer                                              | Servicebio        | G0004       |
| Marker                                                      | UE                | P6110L      |
| Antibody Dilution Buffer                                    | EpiZyme           | PS119S      |
| HRP-conjugated Rabbit Anti-Goat IgG(H+L)                    | proteintech       | SA00001-4   |
| CD63 Recombinant monoclonal antibody                        | proteintech       | 84507-4-RR  |
| TSG101 Antibody                                             | Selleck Chemicals | F1543       |
| Nonfat Dry Milk                                             | LABLEAD           | N7861       |
| qEVoriginal High-Purity Exosome Isolation<br>Column (70 nm) | IZON              | ICO-70      |
| SWE Fast High-Resolution Electrophoresis Buffer<br>(Powder) | Servicebio        | G2081-15    |

## Appendix 2

Product Manual for Prestained Dual Color Protein Marker (10-180 kDa) - UELandy

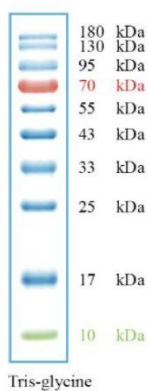

**Figure S1. Electrophoresis and transfer results of the pre-stained protein marker (10-180 kDa, Tri-color) on a 15% Tris-glycine gel.**

The marker was resolved on a 15% SDS-PAGE gel under Tris-glycine buffer conditions. The reference bands are color-coded for easy identification: the 70 kDa band is orange, and the 10 kDa band is green. The full range covers molecular weights from 10 to 180 kDa. This specific formulation (Catalog No.: P6110L, UELandy) is designed to facilitate real-time monitoring of protein separation during electrophoresis and subsequent transfer efficiency onto membranes.

## Appendix 3

### Subcellular Localization

**A**

**B**

**Figure S2. Subcellular localization prediction of lncRNAs ITGA9-AS1 (A) and WNT5A-AS1 (B).**

**Figure S2. Subcellular localization prediction of lncRNAs ITGA9-AS1 (A) and WNT5A-AS1 (B).**

Predictions were generated using the iLoc-LncRNA web server. Panel (A) indicates that ITGA9-AS1 is predominantly localized to the cytoplasm (prediction score = 0.752), while panel (B) predicts a high exosomal enrichment for WNT5A-AS1 (prediction score = 0.844). These computational results underpin the hypothesized functional roles for ITGA9-AS1 in intracellular ceRNA networks and for WNT5A-AS1 in exosome-mediated intercellular communication.

## Original Western blot data

TableS2. Predicted molecular mass of exosomal marker proteins

| Protein Name | Predicted molecular mass |
|--------------|--------------------------|
| CD63         | 26kDa                    |
| Tsg101       | 44 kDa                   |

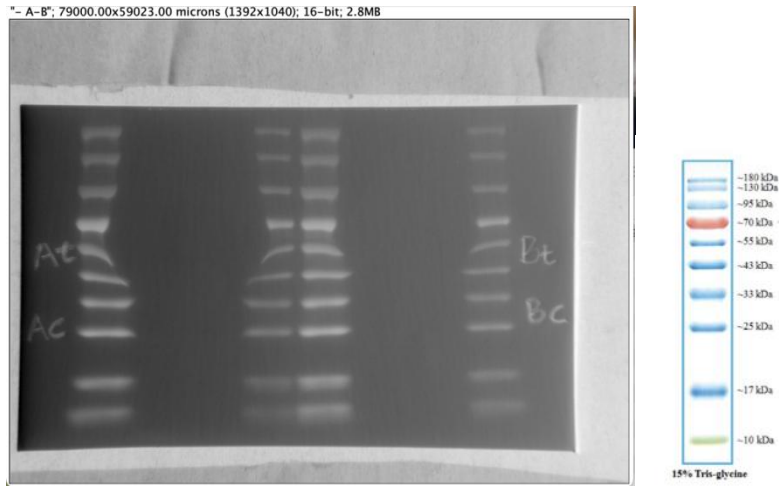

Figure S3. Full-length gel image of group A and B samples (each with one HC and one SZ).

At/Bt : CD63 (~26 kDa) bands in group A and B samples, respectively.

Ac/Bc : Tsg101 (~44 kDa) bands in group A and B samples, respectively.

The right panel shows marker molecular weights for target protein reference.

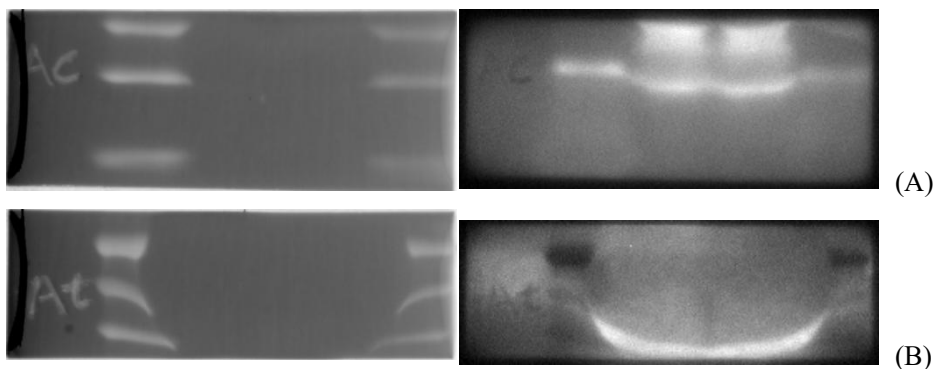

Figure S4. Western Blot detection of CD63 (A) and Tsg101 (B) in group A samples (each containing one HC and one SZ). Specific bands were observed at ~26 kDa (CD63) and 44 kDa (Tsg101), consistent with their predicted molecular masses.

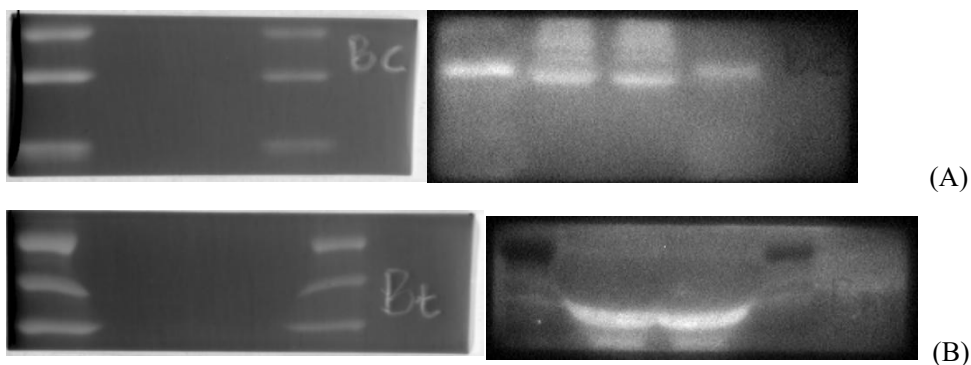

Figure S5. Western Blot detection of CD63 (A) and Tsg101 (B) in group B samples. Band positions are consistent with figure S4.

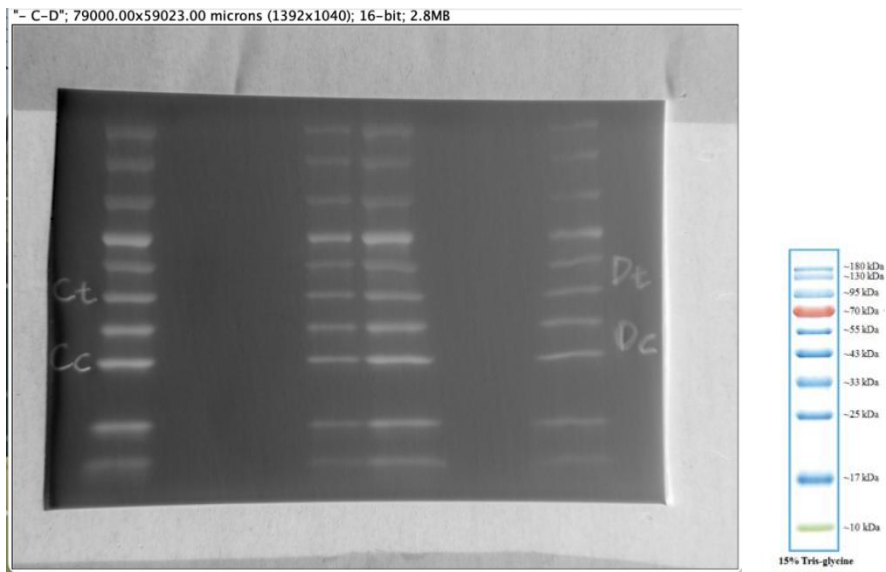

Figure S6. Full-length gel image of group C samples (each with one HC and one SZ), showing the positions of CD63 (~26kDa) and Tsg101 (~44kDa) bands with the pre-stained protein marker on the right.

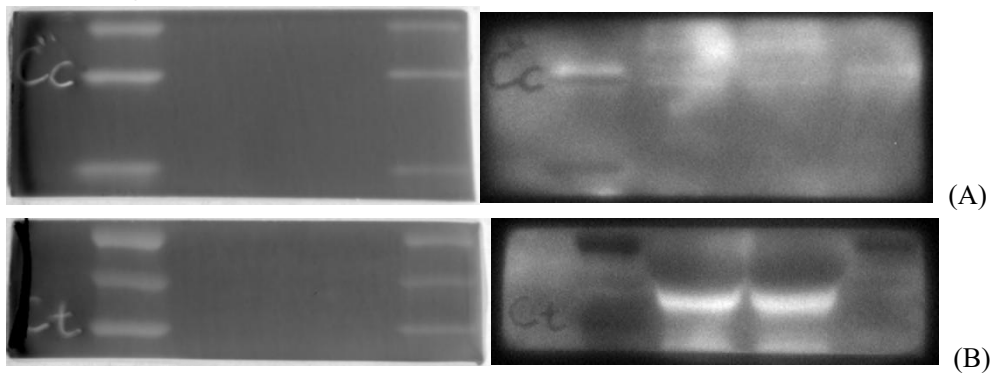

Figure S7. Western Blot detection of CD63 (A) and Tsg101 (B) in group C samples. Band positions are consistent with figure S4.

The anti-CD63 result for Sample C was indistinct. Therefore, Sample F was analyzed instead, as shown below.

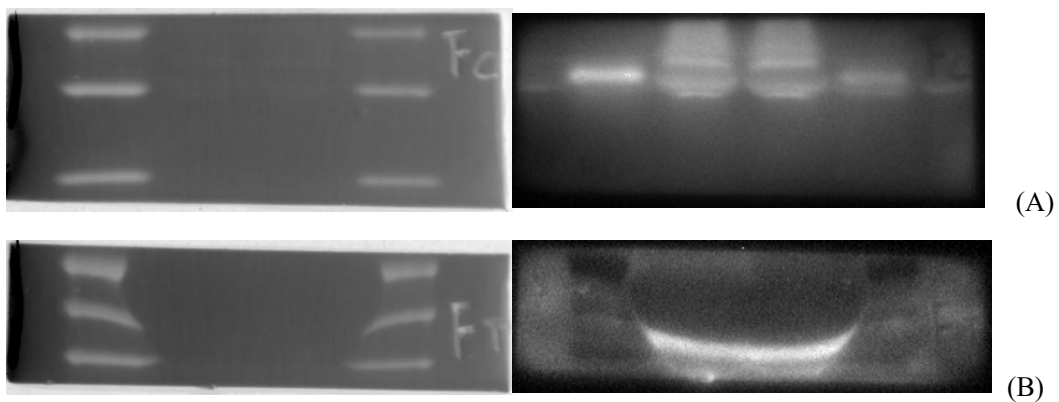

Figure S8. Western Blot detection of CD63 (A) and Tsg101 (B) in group F samples. Band positions are consistent with figure S4.
